# Supplementary material for: Prognostic parameterization of cloud ice with a single category inthe aerosol-climate model ECHAM(v6.3.0)-HAM(v2.3)
Source: Copernicus journal article supplement (doi:10.5194/gmd-2017-164), 2017-08-14
Supplement: Supplementary file [file gmd-2017-164-AC3-supplement.pdf]

# Reply to anonymous Referee #2

Remo Dietlicher

December 22, 2017

Thank you very much for your valuable input on our scheme. Your suggestions led to significant improvements in terms of accuracy and consistency in the description of ice processes. We removed the separate treatment of in-cloud and grid-box mean processes. This step turned out to be necessary to converge to the high-resolution simulation in an enhanced sedimentation test case. At the same time it allows to make use of the sub-stepping for all the processes. Furthermore, the process rates for melting and deposition are now integrated offline and included in the lookup table to make the ice particle properties and process rates entirely consistent.

For the vertical advection of cloud ice we implemented an implicit Euler scheme as reference. To our understanding, there is no perfect integration method for the vertical advection of cloud ice due to the sharp wave-fronts at cloud base and cloud top. The section 4 on the online computation of the number of iterations of the inner and outer loops has been rewritten to explain the nested sub-stepping method in detail. From this it should be clear that for our purposes, the integration method is only of secondary importance.

The point we could not agree with is whether the diagnostic treatment of rain is inconsistent with a prognostic single category for ice. The only interaction between cloud water and ice that is represented by the original cloud microphysics scheme in ECHAM6-HAM2 is freezing of cloud droplets and riming of snow with cloud droplets. The new scheme does that as well. On top of that, it is able to continuously increase the riming rate with increasing ice particle size due to the single category treatment. We are still missing the interaction between rain and cloud ice and it is questionable whether the large-scale model is able to produce the forcing required to form heavily rimed particles at all. With that in mind, we argue that the new scheme is not less consistent than treating both snow and rain diagnostically.

We agree that the framework established here could be extended to include prognostic rain. However, previous work in our group had a different focus and merging the two is out of the scope of this manuscript but envisioned in future work.

Please find detailed answers to your comments below.

## Major points

### 1. Description of the new scheme

The description of the treatment of ice particles in a single category is very short and not sufficient for a journal dedicated to model development. Referring to the original publication Morrison and Milbrandt (2015) is not sufficient. Actually, there are several inconsistencies in the text and also between descriptions and figures. For instance, in the text (page 4, lines 9-10) it is stated that depositional growth is assuming spherical shape.

42 However, in figure 1, this is not the case. Thus, the description of the scheme must be  
43 extended and inconsistencies in the description must be avoided.

44 We extended the section on the original P3 scheme. It now contains all the information  
45 needed to reproduce the P3 lookup tables based on the description in the original P3 pa-  
46 per. As to the inconsistency pointed out here, we changed the wording to better explain  
47 what we meant.

48

49 2a) The treatment of sedimenting particles of different water phases is inconsistent. While  
50 sedimenting ice particles are treated prognostically using a time splitting, rain is treated  
51 with a diagnostic scheme. Although the authors state that they want to focus on the  
52 representation of cloud ice, this is not enough because the P3 scheme actually describes  
53 the interaction of liquid and solid cloud particles. Thus, also the treatment of sedimen-  
54 tation should be consistent. Since former work at ETH was carried out on treatment of  
55 prognostic rain, it is not really understandable, why the authors restrict the scheme to  
56 diagnostic rain.

57 We separate this comment into two parts and answer them separately: 1) 'diagnostic rain  
58 is inconsistent with the P3 method that explicitly considers riming' and 2) 'previous  
59 work at ETH already involved prognostic rain, why is it not included in this study'.

60 1) In light of chapter 5.3, we doubt that large-scale models are able to reproduce the  
61 conditions which allow for an accurate representation of riming because it relies on the  
62 turbulent motion within the cloud. Thus we argue that neglecting riming involving rain  
63 drops is not the major concern for a realistic representation of the rime formation.

64 2) Former work in our group was targeted at the representation of marine stratiform  
65 clouds with a focus on cloud droplet activation and the representation of cloud and rain  
66 drop spectra. While a completely prognostic scheme is envisioned in future, merging the  
67 two is out of the scope of this manuscript.

68

69 2b) For the prognostic treatment of sedimentation of ice a time sub-stepping has been  
70 introduced. For the one-dimensional advection in the column an explicit Euler scheme  
71 was used. It is not really clear, why an explicit scheme is used, since this has crucial  
72 restrictions due to CFL criterion. Why not using an implicit scheme (even of higher  
73 order)? Such a scheme would be more robust and the restrictions to the sub time step  
74 would be more relaxed, since implicit schemes are commonly more stable.

75 To our understanding, the perfect integration method to solve the advection equation  
76 for sedimenting ice does not exist. As it is elaborated more clearly in the text now,  
77 the perfect method would need to be non-dispersive, unconditionally stable and able to  
78 deal with sharp wave-fronts that are encountered at cloud base and cloud top. While  
79 an implicit method satisfies the first two requirements, it does not satisfy the third. At  
80 the same time, CFL numbers are not the main concern in our case because ECHAM-  
81 HAM uses thin levels close to the ground and broader ones aloft (see the new figure 3).  
82 Therefore, the online reduction of the time-step to limit the CFL number in the lowest  
83 levels implies that CFL numbers are very small higher up. Since this reduction of the  
84 time-step can be done by the very cheap inner loop, the integration method is of secondary  
85 importance.

86 Nevertheless, we implemented a backward Euler method which is still available in the  
87 code. All the results using the full sub-stepping shown in the manuscript are almost iden-  
88 tical, regardless of the integration method.

89

90 3. Description of results

91 Although the results seem to show an improvement in representation of ice in mixed-phase  
92 clouds, the description of the results is a bit confusing and it is hard to follow, what the  
93 authors wanted to say. Please state your major results and the improvements due to the  
94 introduction of the new scheme in a clearer and more structured way.

95 We aligned the story around the steps of validation (5.1) to adaptation for the GCM  
96 (5.2) to limitations (5.3). For this we renamed the subsection titles and made the text  
97 more concise. Especially in section 5.1 we elaborated more precisely how the different  
98 microphysics schemes relate to each other and why the new scheme solves many of the  
99 problems we had with the previous ones.

100  
101 **Minor points**

102 1. Sub stepping for particle generation?

103 It is not clear why sub stepping was not introduced for particle generation, too. Since  
104 processes of activation, freezing or nucleation are highly sensitive to time steps, the ex-  
105 isting framework of sub stepping, as designed for other processes, could be used for this  
106 purpose. For instance, the resolved dynamics could be used as a criterion, whether par-  
107 ticle generation will occur in a time step. Then, particle generation processes could be  
108 resolved in the sub stepping. Please comment on this issue.

109 Now there is sub-stepping for all process rates. Freezing was already part of the sub-  
110 stepping loop. Activation of cloud droplets and nucleation of ice crystals in cirrus clouds  
111 are parameterized in a somewhat special way. The cirrus and activation methods involve  
112 an adiabatic parcel ascent that is assumed to contain the entire process from ascent to  
113 particle formation and depletion of supersaturation within a single time-step. This as-  
114 sumption no longer holds for a variable time-step. This is also discussed in the text now.

115  
116 2. Equation (9) is not consistent with thermodynamics in mixed-phase clouds

117 In mixed-phase clouds the water vapour is close to equilibrium with respect to liquid  
118 phase, i.e.  $RH \sim 1$  until all water has been transformed into ice; then growth of ice  
119 particles reduce relative humidity towards ice saturation. Thus, the blend of two different  
120 equilibria is not really consistent. Is this quantity only used for cloud cover or is it used  
121 for the description of cloud processes in mixed-phase clouds? Please explain this.

122 Equation (9) is only used for the cloud fraction parametrization, i.e. the cloud frac-  
123 tion  $b$  and the water mass that is available for condensation/deposition (or required to  
124 evaporate/sublimate)  $Q$ . The deposition rate is computed using the relative humidity at  
125 water saturation within a mixed-phase cloud as long as cloud water is present and the  
126 grid-box mean relative humidity otherwise (e.g. for melting and sublimation of cloud ice).

127  
128 3. Equation (11) for growth in WBF process

129 Is the assumption of planar ice particles consistent with the assumptions in the P3 scheme?  
130 Please clarify.

131 No and we changed that now. We integrate the process rates for deposition/sublimation  
132 and melting (which both depend on the capacitance  $C$  and the ventilation coefficient  
133  $f_v$ ) offline. We use different capacities for the different particle property regimes (small  
134 spherical ice, dendrites, graupel, partially rimed crystals) to account for the different ge-  
135 ometries of the particles.

136  
137 4. Use of TKE scheme for subgrid scale vertical velocity

138 From a recent study it is known that the TKE based subgrid scale wind parameterisation  
139 and the related ice nucleation significantly overestimates the ice crystal number concen-  
140 tration (Zhou et al., 2016). Please comment, why this parameterisation is used in the  
141 model.

142 An improved version of the cirrus scheme is being developed in our group. The new  
143 scheme will include pre-existing ice crystals, homogeneous and heterogeneous nucleation  
144 and a different approach to represent the sub-grid scale updraft. For this reason we use  
145 the original parameterization of cirrus clouds in ECHAM6-HAM2. It is interesting to  
146 see that for CAM5 the use of TKE leads to an overestimation of the updrafts while in  
147 ECHAM5 a study by Joos et. al. 2008 showed that better agreement with observations  
148 could be reached when, instead of TKE, gravity waves were used to calculate updraft  
149 velocities over mountains.

150

151 5. Section 3.3.4

152 What is the physical basis for the melting time step of  $mlt = 1 \text{ min}$ ?

153 There is none. The goal was to melt all ice within one global model time-step, because  
154 this was the assumption in the original scheme. We now included a parameterization  
155 based on Mason (1958) [1] found in the book on 'Cloud and precipitation microphysics'  
156 by Straka (2009) [2]. Just as with the size dependent deposition rate, this is calculated  
157 offline and read back from lookup tables.

158

159 6. Autoconversion and accretion parameterisations

160 In the original article by Khairoutdinov and Kogan (2000) it is stated clearly that their  
161 scheme was derived for LES models, i.e. for a spatial resolution of tens of metres. They  
162 also stated that the scheme cannot be simply extrapolated for use in large-scale models  
163 (see page 231, left column, lines 3-16). Please justify, why this parameterisation is used  
164 in a large-scale model with a horizontal resolution of few tens of kilometers.

165 Yes, that is right. In fact, most parameterizations have been developed either from in-situ  
166 data or from process models, both of which are representative for a much smaller scale  
167 than a GCM grid-box.

168

169 7. Page 11, lines 21-27:

170 The description of the simulation scenario, especially of initial and boundary conditions  
171 is very short. Please extend the description.

172 The description has been rewritten to include the values for the prescribed tendencies for  
173 the four ice moments.

174

175 8. Description of figures 3 and 4

176 Although in the figure a reference simulation FL is indicated, the description of this  
177 simulation setup cannot be found in the text. The question arises if there was a series  
178 of simulations with decreasing time step leading in convergence to a reference simulation  
179 with very short time step. Was FL designed like this? Please explain. The dashed black  
180 line in figures 3 and 4 is quite hard to read, please change the line style.

181 With the major changes to this chapter, the simulations are described more clearly. For  
182 us the dashed black line is well readable. Maybe there is an issue with importing figures  
183 as pdfs. We will double-check that the final version does not have this problem or maybe  
184 switch to a bit-map to assure cross-platform compatability.

185

186 9. Name 2.5 category

187 Actually, I was a bit confused by the names 1, 2 and 2.5 category. Since in cloud physics  
188 often single and double moment schemes are used, and we tend to believe that double  
189 moment schemes are better and schemes with more categories are also better, the names  
190 are a bit counter-intuitive. Actually, I have no better suggestion; maybe it would help to  
191 clarify the names in the very beginning in a more concise way.

192 The paradigm shift that more is not always better when it comes to ice categories is  
193 the entire point of the original P3 paper (and to some extent also this work). Therefore  
194 it is also inherently counter-intuitive. We tried to highlight the difference between the  
195 one and two category schemes by adding a row in table 1 with the number of prognostic  
196 parameters and an additional sentence clarifying that the single category actually uses  
197 more prognostic parameters than the original ice category.

## 198 **References**

- 199 [1] B. J. Mason. The physics of clouds. *Q. j. roy. meteor. soc.*, 84(361):304–304, 1958.
- 200 [2] J. M. Straka. *Cloud and Precipitation Microphysics: Principles and Parameteriza-*  
201 *tions*. Cambridge University Press, 2009.
